# Supplementary material
Source: HighWire-hosted journal article supplement (https://www.cmajopen.ca/highwire/filestream/81161/field_highwire_adjunct_files/1/2017-0123-2-at.pdf)
Supplement: 2017-0123-2-at.pdf [file 2017-0123-2-at.pdf]

**Appendix 2 (as supplied by the authors): Survey structure**

**"Hi, I was wondering if I could speak with a pharmacist.  
I'm calling to ask if you have any naloxone available for  
pick up today?"**

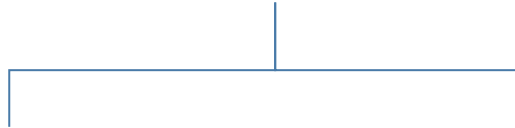

**YES**

Is there an associated cost? (Y/N)

**NO**

**1. What is the reason?**

Need prescription?

Not trained?

Not available yet?

No demand?

We simply do not carry it?

FREE TEXT

**2. Would you be able to get it  
within the next week?**

**3. If yes, is there an associated  
cost?**
